# Supplementary material for: Association between cellular immune response and spleen weight in mice with hepatocellular carcinoma
Source: PubMed Central journal article supplement — Oncol Lett. 2021 Jun 30;22(2):625. doi: 10.3892/ol.2021.12886 (PMC8258616; doi:10.3892/ol.2021.12886), 2021-06-30

Figure S1. Representative flow cytometry dot plots of splenic (A) CD4<sup>+</sup> T lymphocytes and CD8<sup>+</sup> T lymphocytes, (B) CD4<sup>+</sup> PD1<sup>+</sup> T lymphocytes, (C) CD8<sup>+</sup> PD1<sup>+</sup> T lymphocytes, (D) CD11b<sup>+</sup>F4/80<sup>+</sup> macrophages, (E) CD11c<sup>+</sup>MHCII<sup>+</sup> dendritic cells, (F) CD3<sup>+</sup>NK1.1<sup>+</sup> natural killer cells and CD3<sup>+</sup>NK1.1<sup>+</sup> natural killer T cells. F4/80, adhesion G protein-coupled receptor E1; MHC, major histocompatibility complex; NK1.1, natural killer 1.1; PD1, programmed cell death protein 1; SSC, side scatter.

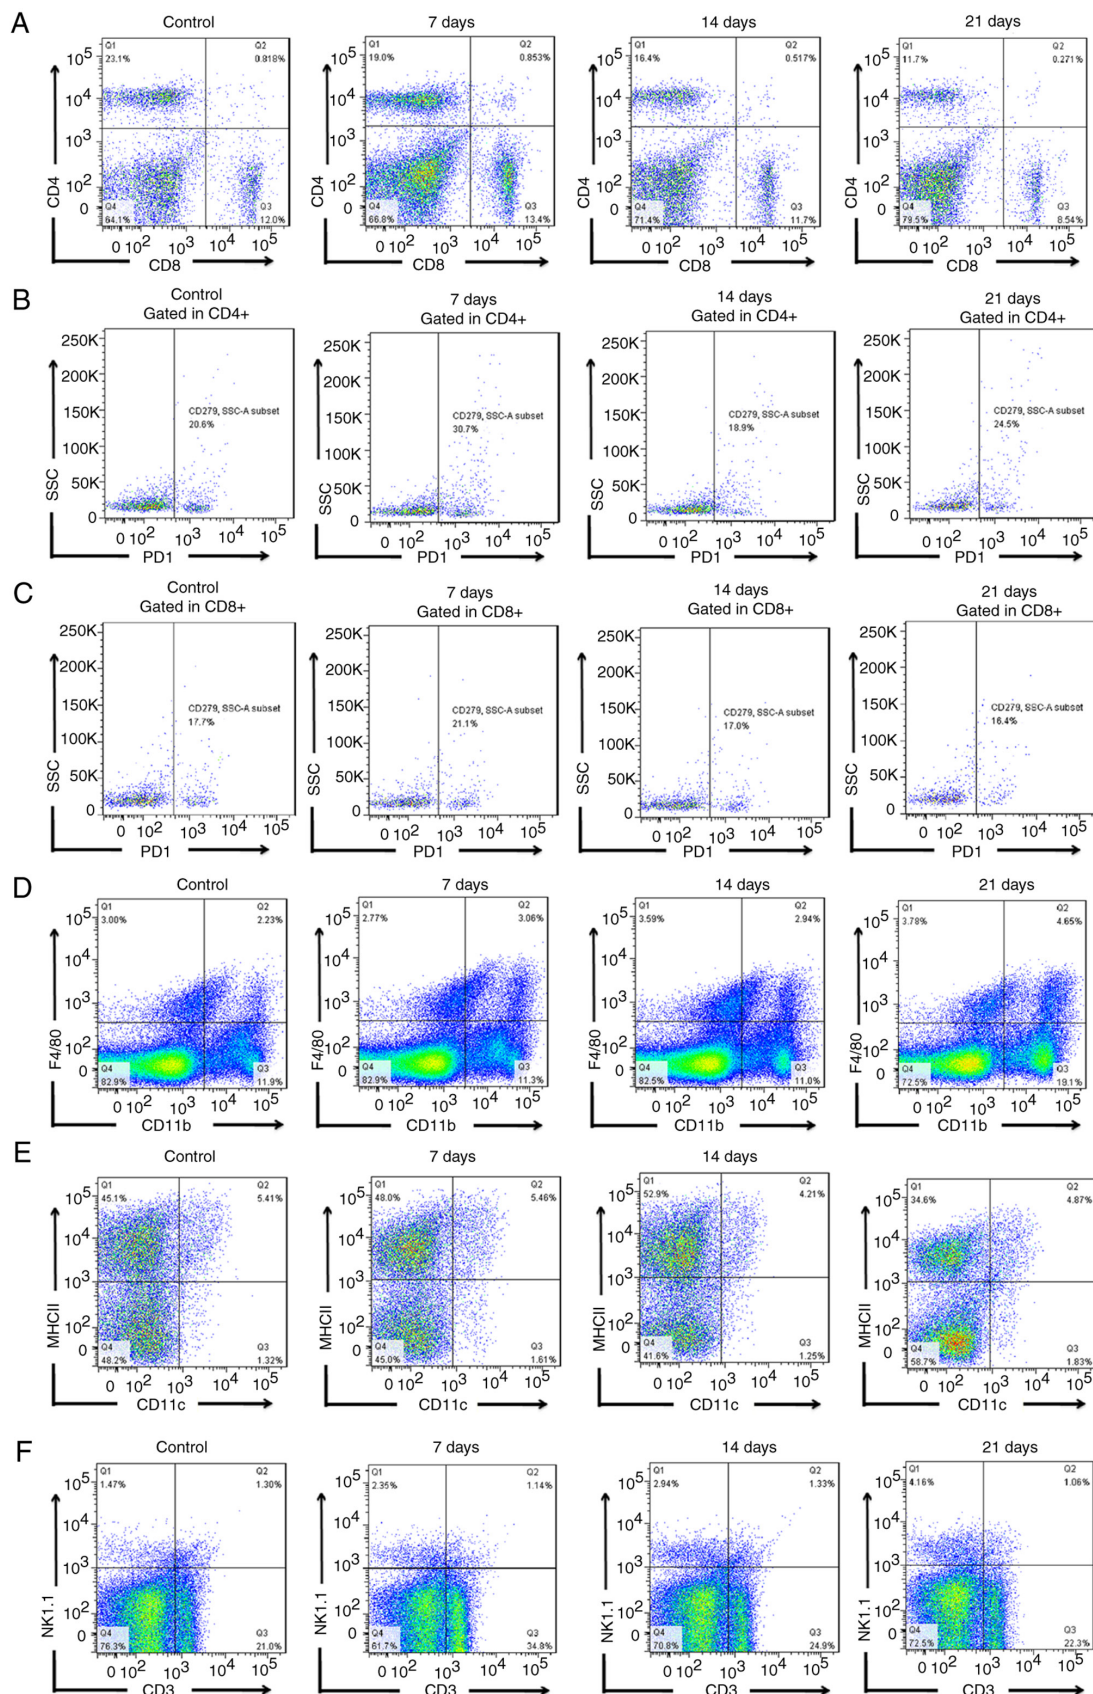

Figure S2. Representative flow cytometry dot plots of blood (A) CD4<sup>+</sup> PD1<sup>+</sup> T lymphocytes, (B) CD8<sup>+</sup> PD1<sup>+</sup> T lymphocytes, (C) myeloid-derived suppressor cells (among total cells), (D) CD11c<sup>+</sup>MHCII<sup>+</sup> dendritic cells, CD3<sup>+</sup>NK1.1<sup>+</sup> natural killer and (E) CD3<sup>+</sup>NK1.1<sup>+</sup> natural killer T cells. Ly6, lymphocyte antigen 6; MHC, major histocompatibility complex; NK1.1, natural killer 1.1; PD1, programmed cell death protein 1; SSC, side scatter; SSC-A, SSC area.

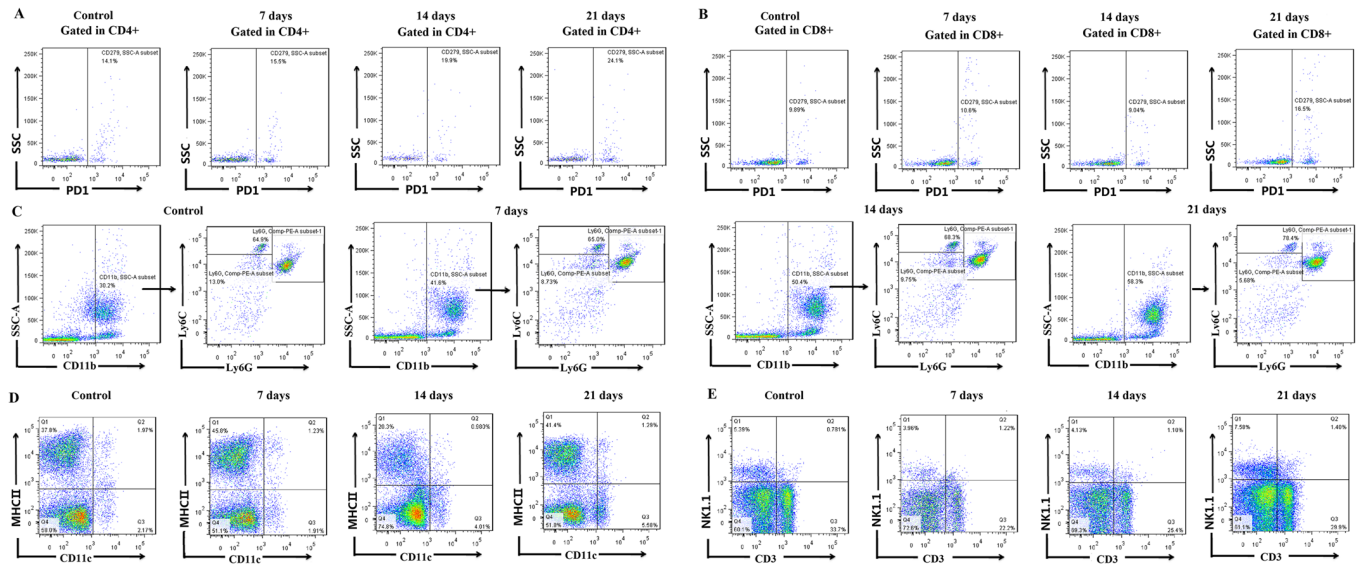

Supplement: Supplementary_Data.pdf [file Supplementary_Data.pdf]
